# Supplementary material for: High coercivity stellated cobalt metal multipods through solvothermal reduction of cobalt hydroxide nanosheets
Source: Royal Society of Chemistry journal article supplement (doi:10.1039/c6ra25309a), 2017-01-01
Supplement: c6ra25309a1.pdf [file c6ra25309a1.pdf]

## Supporting Information

# High Coercivity Stellated Cobalt Metal Multipods through Solvothermal Reduction of Cobalt hydroxide Nanosheets

*C. Nethravathi,<sup>†</sup> Catherine R. Rajamathi,<sup>‡</sup> Sanjay Singh,<sup>‡</sup> Michael Rajamathi,<sup>†,\*</sup>*

*Claudia Felser<sup>‡</sup>*

<sup>†</sup> Materials Research Group, Department of Chemistry, St. Joseph's College, 36 Lalbagh Road,  
Bangalore 560 027, India

<sup>‡</sup> Max-Planck Institute for Chemical Physics of Solids, Dresden, Germany

Corresponding authors: [mikerajamathi@rediffmail.com](mailto:mikerajamathi@rediffmail.com)

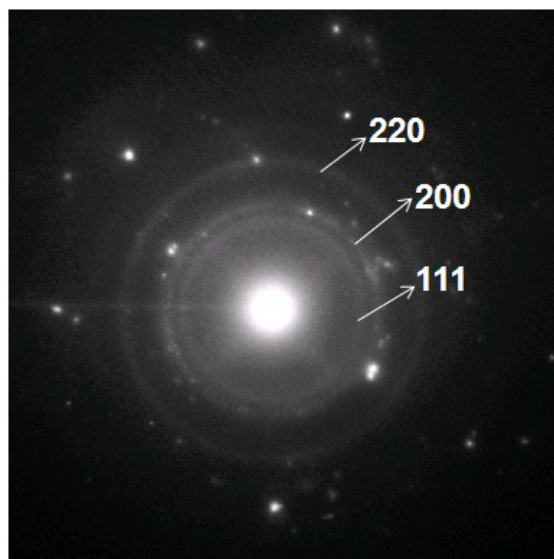

**Figure S1** Electron diffraction pattern of *fcc* CoO spheres

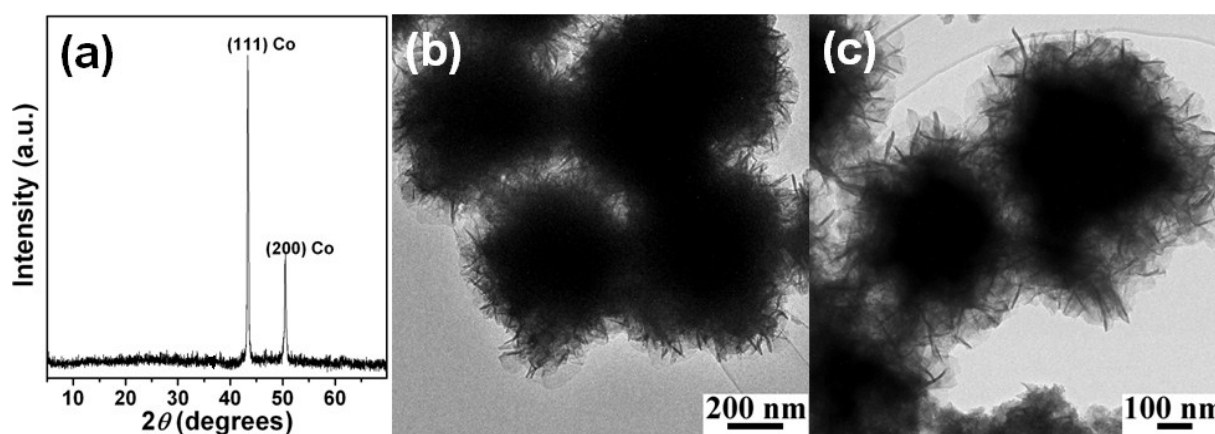

**Figure S2** XRD pattern (a) and bright field TEM images (b and c) of the cobalt metal obtained on solvothermal decomposition of cobalt acetate in 1-butanol in the presence of oleylamine.

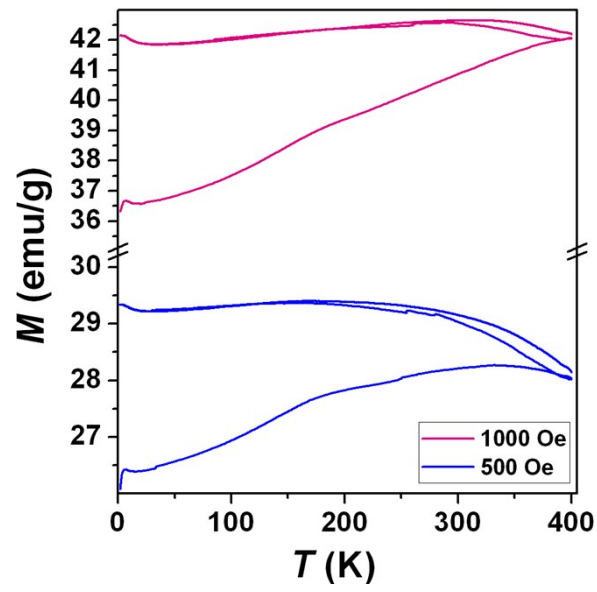

**Figure S3** The field cooled (FC) and zero field cooled (ZFC) magnetization curves of stellated cobalt multipods
